# Supplementary material for: Plasmatic Membrane Expression of Adhesion Molecules in Human Cardiac Progenitor/Stem Cells Might Explain Their Superior Cell Engraftment after Cell Transplantation
Source: Hindawi journal article supplement (doi:10.1155/2020/8872009), 2020-10-10

Ontoria-Oviedo, *et al.* Supplemental Figure 1

CPC

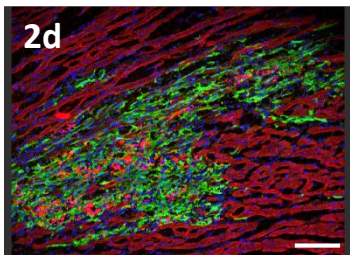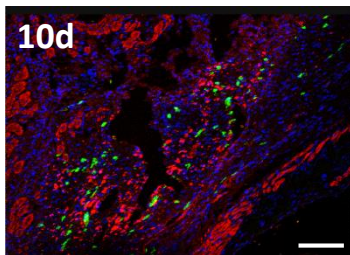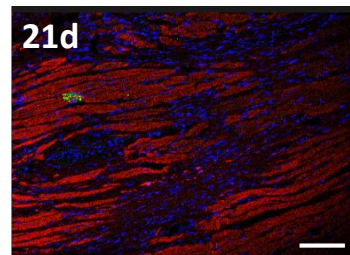

BM-MSC

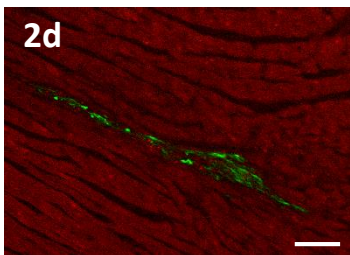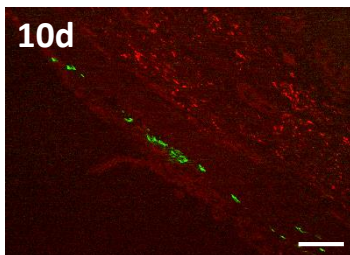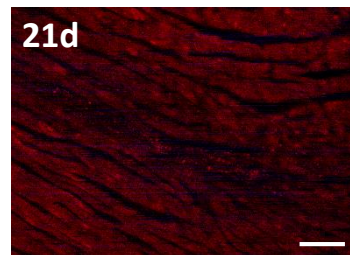

Supplement: f1 [file 8872009.f1.pdf]
