# Supplementary material for: Plasmatic Membrane Expression of Adhesion Molecules in Human Cardiac Progenitor/Stem Cells Might Explain Their Superior Cell Engraftment after Cell Transplantation
Source: Stem Cells Int. 2020 Oct 10;2020:8872009. doi: 10.1155/2020/8872009 (PMC7569451; doi:10.1155/2020/8872009)
Supplement: Supplementary 2 — Supplemental Table 1. Protein identification of biotinylated proteins from the plasmatic membrane fractions of cardiac progenitor/stem cells. [file 8872009.f2.txt]

N	Unused	Total	%Cov	%Cov(50)	%Cov(95)	Accession	Name	Species	Peptides(95%)
1	292.46	292.46	78.93000245	69.44000125	64.99999762	sp|P35579|MYH9_HUMAN	Myosin-9 OS=Homo sapiens GN=MYH9 PE=1 SV=4	HUMAN	169
2	88.53	88.53	35.13000011	22.47000039	19.16999966	sp|P12111|CO6A3_HUMAN	Collagen alpha-3(VI) chain OS=Homo sapiens GN=COL6A3 PE=1 SV=5	HUMAN	43
4	67.36	67.36	61.01999879	52.48000026	52.48000026	sp|P04264|K2C1_HUMAN	Keratin, type II cytoskeletal 1 OS=Homo sapiens GN=KRT1 PE=1 SV=6	HUMAN	34
6	60.19	60.19	41.13999903	22.69999981	14.31999952	sp|P21333|FLNA_HUMAN	Filamin-A OS=Homo sapiens GN=FLNA PE=1 SV=4	HUMAN	25
8	53.23	60.62	76.67999864	71.05000019	61.1899972	sp|P35908|K22E_HUMAN	Keratin, type II cytoskeletal 2 epidermal OS=Homo sapiens GN=KRT2 PE=1 SV=2	HUMAN	30
10	50.88	50.88	67.11999774	63.17999959	58.73000026	sp|P13645|K1C10_HUMAN	Keratin, type I cytoskeletal 10 OS=Homo sapiens GN=KRT10 PE=1 SV=6	HUMAN	29
11	47.09	47.8	81.33000135	66.74000025	44.85000074	sp|P08670|VIME_HUMAN	Vimentin OS=Homo sapiens GN=VIM PE=1 SV=4	HUMAN	22
13	39.16	39.16	75.88999867	54.24000025	46.14000022	sp|P14618|KPYM_HUMAN	Pyruvate kinase PKM OS=Homo sapiens GN=PKM PE=1 SV=4	HUMAN	19
14	35.97	35.97	80.400002	79.90000248	78.89000177	sp|Q06830|PRDX1_HUMAN	Peroxiredoxin-1 OS=Homo sapiens GN=PRDX1 PE=1 SV=1	HUMAN	26
16	33.37	33.37	77.64999866	65.4399991	63.8199985	sp|P06733|ENOA_HUMAN	Alpha-enolase OS=Homo sapiens GN=ENO1 PE=1 SV=2	HUMAN	21
18	29.99	30.05	60.18999815	47.0299989	47.0299989	sp|P35527|K1C9_HUMAN	Keratin, type I cytoskeletal 9 OS=Homo sapiens GN=KRT9 PE=1 SV=3	HUMAN	16
19	28.27	28.27	35.83999872	24.31000024	22.67999947	sp|P05556|ITB1_HUMAN	Integrin beta-1 OS=Homo sapiens GN=ITGB1 PE=1 SV=2	HUMAN	16
22	24.15	24.15	43.54999959	37.45999932	32.58000016	sp|P21589|5NTD_HUMAN	5'-nucleotidase OS=Homo sapiens GN=NT5E PE=1 SV=1	HUMAN	12
23	23.72	23.72	37.88000047	20.22999972	12.69000024	sp|P06756|ITAV_HUMAN	Integrin alpha-V OS=Homo sapiens GN=ITGAV PE=1 SV=2	HUMAN	10
24	23.6	23.6	64.38000202	53.70000005	49.59000051	sp|P30453|1A34_HUMAN	HLA class I histocompatibility antigen, A-34 alpha chain OS=Homo sapiens GN=HLA-A PE=1 SV=1	HUMAN	12
25	22.11	22.11	54.47999835	41.7899996	35.56999862	sp|P05121|PAI1_HUMAN	Plasminogen activator inhibitor 1 OS=Homo sapiens GN=SERPINE1 PE=1 SV=1	HUMAN	14
26	21.76	21.76	48.93000126	29.96999919	22.63000011	sp|P11021|GRP78_HUMAN	78 kDa glucose-regulated protein OS=Homo sapiens GN=HSPA5 PE=1 SV=2	HUMAN	11
27	21.57	21.57	60.04999876	49.27999973	35.17000079	sp|P50454|SERPH_HUMAN	Serpin H1 OS=Homo sapiens GN=SERPINH1 PE=1 SV=2	HUMAN	11
28	21.06	21.06	26.0800004	16.85000062	12.28	sp|P17301|ITA2_HUMAN	Integrin alpha-2 OS=Homo sapiens GN=ITGA2 PE=1 SV=1	HUMAN	11
29	20.43	20.43	70.23000121	49.12999868	39.59999979	sp|P04083|ANXA1_HUMAN	Annexin A1 OS=Homo sapiens GN=ANXA1 PE=1 SV=2	HUMAN	11
31	18.82	18.82	21.87999934	7.477000356	7.477000356	sp|Q9Y490|TLN1_HUMAN	Talin-1 OS=Homo sapiens GN=TLN1 PE=1 SV=3	HUMAN	11
32	18.73	18.73	22.24999964	9.684000164	7.073000073	sp|O15031|PLXB2_HUMAN	Plexin-B2 OS=Homo sapiens GN=PLXNB2 PE=1 SV=3	HUMAN	10
33	18.68	18.73	87.44000196	70.85000277	66.8299973	sp|P37802|TAGL2_HUMAN	Transgelin-2 OS=Homo sapiens GN=TAGLN2 PE=1 SV=3	HUMAN	12
34	17.24	17.24	44.36999857	27.68000066	14.79000002	sp|O00469|PLOD2_HUMAN	Procollagen-lysine,2-oxoglutarate 5-dioxygenase 2 OS=Homo sapiens GN=PLOD2 PE=1 SV=2	HUMAN	8
37	16.5	16.5	56.72000051	48.96000028	40.29999971	sp|P04406|G3P_HUMAN	Glyceraldehyde-3-phosphate dehydrogenase OS=Homo sapiens GN=GAPDH PE=1 SV=3	HUMAN	10
38	16.12	16.12	62.95999885	62.95999885	55.55999875	sp|P09382|LEG1_HUMAN	Galectin-1 OS=Homo sapiens GN=LGALS1 PE=1 SV=2	HUMAN	9
39	15.9	15.9	19.07999963	15.62999934	8.980999887	sp|Q8IUX7|AEBP1_HUMAN	Adipocyte enhancer-binding protein 1 OS=Homo sapiens GN=AEBP1 PE=1 SV=1	HUMAN	7
40	15.7	15.7	27.00999975	25.70999861	25.70999861	sp|P35613|BASI_HUMAN	Basigin OS=Homo sapiens GN=BSG PE=1 SV=2	HUMAN	9
44	13.75	13.75	18.86000037	7.504999638	7.504999638	sp|Q9UBG0|MRC2_HUMAN	C-type mannose receptor 2 OS=Homo sapiens GN=MRC2 PE=1 SV=2	HUMAN	7
46	13.17	13.17	38.87999952	20.61000019	20.61000019	sp|P25705|ATPA_HUMAN	ATP synthase subunit alpha, mitochondrial OS=Homo sapiens GN=ATP5A1 PE=1 SV=1	HUMAN	8
47	12.92	12.92	75.90000033	63.85999918	52.41000056	sp|P23528|COF1_HUMAN	Cofilin-1 OS=Homo sapiens GN=CFL1 PE=1 SV=3	HUMAN	6
52	11.45	11.45	32.76000023	24.52999949	20.57999969	sp|Q13740|CD166_HUMAN	CD166 antigen OS=Homo sapiens GN=ALCAM PE=1 SV=2	HUMAN	6
55	10.46	10.46	17.64000058	10.86999997	5.719999969	sp|P08648|ITA5_HUMAN	Integrin alpha-5 OS=Homo sapiens GN=ITGA5 PE=1 SV=2	HUMAN	5
57	9.92	9.92	28.29000056	12.89000064	7.762999833	sp|P02786|TFR1_HUMAN	Transferrin receptor protein 1 OS=Homo sapiens GN=TFRC PE=1 SV=2	HUMAN	5
58	9.85	9.85	18.70999932	11.5699999	8.428999782	sp|Q96QV1|HHIP_HUMAN	Hedgehog-interacting protein OS=Homo sapiens GN=HHIP PE=1 SV=3	HUMAN	5
61	9.56	9.56	32.82999992	14.01000023	11.45000011	sp|P02545|LMNA_HUMAN	Prelamin-A/C OS=Homo sapiens GN=LMNA PE=1 SV=1	HUMAN	6
62	9.54	9.54	42.95000136	19.74000037	16.49000049	sp|P13489|RINI_HUMAN	Ribonuclease inhibitor OS=Homo sapiens GN=RNH1 PE=1 SV=2	HUMAN	5
63	9.51	9.51	14.14999962	11.59000024	7.682000101	sp|P16070|CD44_HUMAN	CD44 antigen OS=Homo sapiens GN=CD44 PE=1 SV=3	HUMAN	5
64	9.44	9.44	39.05999959	36.71999872	36.71999872	sp|P13987|CD59_HUMAN	CD59 glycoprotein OS=Homo sapiens GN=CD59 PE=1 SV=1	HUMAN	5
65	9.37	9.37	16.13000035	12.47000024	12.47000024	sp|O15427|MOT4_HUMAN	Monocarboxylate transporter 4 OS=Homo sapiens GN=SLC16A3 PE=1 SV=1	HUMAN	5
67	8.86	8.86	14.37000036	9.104000032	9.104000032	sp|P23142|FBLN1_HUMAN	Fibulin-1 OS=Homo sapiens GN=FBLN1 PE=1 SV=4	HUMAN	5
68	8.8	8.8	33.1400007	11.28999963	9.955000132	sp|P08133|ANXA6_HUMAN	Annexin A6 OS=Homo sapiens GN=ANXA6 PE=1 SV=3	HUMAN	5
69	8.73	8.73	30.88000119	15.09000063	12.28	sp|Q14195|DPYL3_HUMAN	Dihydropyrimidinase-related protein 3 OS=Homo sapiens GN=DPYSL3 PE=1 SV=1	HUMAN	6
71	8.42	8.42	21.69000059	7.948999852	7.163999975	sp|P12110|CO6A2_HUMAN	Collagen alpha-2(VI) chain OS=Homo sapiens GN=COL6A2 PE=1 SV=4	HUMAN	6
72	8.23	8.23	18.88999939	12.21999973	9.523999691	sp|P08195|4F2_HUMAN	4F2 cell-surface antigen heavy chain OS=Homo sapiens GN=SLC3A2 PE=1 SV=3	HUMAN	5
75	7.64	7.64	17.82000065	6.938000023	5.742000043	sp|Q9H5V8|CDCP1_HUMAN	CUB domain-containing protein 1 OS=Homo sapiens GN=CDCP1 PE=1 SV=3	HUMAN	5
76	7.61	7.61	23.54000062	8.851999789	4.96100001	sp|P12109|CO6A1_HUMAN	Collagen alpha-1(VI) chain OS=Homo sapiens GN=COL6A1 PE=1 SV=3	HUMAN	4
77	7.5	7.5	22.85999954	16.42999947	12.13999987	sp|Q13641|TPBG_HUMAN	Trophoblast glycoprotein OS=Homo sapiens GN=TPBG PE=1 SV=1	HUMAN	4
78	7.26	10.76	40.4700011	16.94999933	14.40999955	sp|P02533|K1C14_HUMAN	Keratin, type I cytoskeletal 14 OS=Homo sapiens GN=KRT14 PE=1 SV=4	HUMAN	7
79	7.26	7.26	24.60000068	17.2999993	10.48000008	sp|P13797|PLST_HUMAN	Plastin-3 OS=Homo sapiens GN=PLS3 PE=1 SV=4	HUMAN	4
80	7.25	7.26	35.67999899	21.35999948	12.26999983	sp|Q15084|PDIA6_HUMAN	Protein disulfide-isomerase A6 OS=Homo sapiens GN=PDIA6 PE=1 SV=1	HUMAN	3
81	7.09	11.35	10.79000011	3.449999914	3.046000004	sp|Q14315|FLNC_HUMAN	Filamin-C OS=Homo sapiens GN=FLNC PE=1 SV=3	HUMAN	6
82	6.98	6.98	35.62999964	9.003999829	9.003999829	sp|P00390|GSHR_HUMAN	Glutathione reductase, mitochondrial OS=Homo sapiens GN=GSR PE=1 SV=2	HUMAN	4
83	6.96	6.96	20.67999989	12.97000051	9.961999953	sp|P05362|ICAM1_HUMAN	Intercellular adhesion molecule 1 OS=Homo sapiens GN=ICAM1 PE=1 SV=2	HUMAN	4
85	6.83	6.83	21.09999955	16.24000072	7.858999819	sp|P15144|AMPN_HUMAN	Aminopeptidase N OS=Homo sapiens GN=ANPEP PE=1 SV=4	HUMAN	4
87	6.76	14.86	48.89999926	30.10999858	27.90000141	sp|P30462|1B14_HUMAN	HLA class I histocompatibility antigen, B-14 alpha chain OS=Homo sapiens GN=HLA-B PE=1 SV=1	HUMAN	8
89	6.62	21.03	57.26000071	50.95999837	46.84999883	sp|P01892|1A02_HUMAN	HLA class I histocompatibility antigen, A-2 alpha chain OS=Homo sapiens GN=HLA-A PE=1 SV=1	HUMAN	12
90	6.6	34.52	31.77999854	12.96000034	9.514000267	sp|P35580|MYH10_HUMAN	Myosin-10 OS=Homo sapiens GN=MYH10 PE=1 SV=3	HUMAN	18
92	6.5	6.5	25.52999854	7.631999999	4.868000001	sp|Q12884|SEPR_HUMAN	Seprase OS=Homo sapiens GN=FAP PE=1 SV=5	HUMAN	3
93	6.3	16.8	28.97999883	19.32000071	15.25000036	sp|P13647|K2C5_HUMAN	Keratin, type II cytoskeletal 5 OS=Homo sapiens GN=KRT5 PE=1 SV=3	HUMAN	10
95	6.21	6.21	53.32999825	46.66999876	38.10000122	sp|P31949|S10AB_HUMAN	Protein S100-A11 OS=Homo sapiens GN=S100A11 PE=1 SV=2	HUMAN	3
98	6	6	15.13999999	15.13999999	15.13999999	sp|P14209|CD99_HUMAN	CD99 antigen OS=Homo sapiens GN=CD99 PE=1 SV=1	HUMAN	6
101	5.64	5.64	44.35000122	18.54999959	14.51999992	sp|P18124|RL7_HUMAN	60S ribosomal protein L7 OS=Homo sapiens GN=RPL7 PE=1 SV=1	HUMAN	3
104	5.43	5.43	14.48000073	7.306999713	7.306999713	sp|P41250|SYG_HUMAN	Glycine--tRNA ligase OS=Homo sapiens GN=GARS PE=1 SV=3	HUMAN	3
105	5.41	5.41	42.73000062	37.88999915	26.42999887	sp|P22061|PIMT_HUMAN	Protein-L-isoaspartate(D-aspartate) O-methyltransferase OS=Homo sapiens GN=PCMT1 PE=1 SV=4	HUMAN	3
106	5.34	5.34	34.90999937	15.48999995	9.711000323	sp|O00622|CYR61_HUMAN	Protein CYR61 OS=Homo sapiens GN=CYR61 PE=1 SV=1	HUMAN	3
108	5.28	5.28	17.04999954	10.67999974	10.67999974	sp|O14763|TR10B_HUMAN	Tumor necrosis factor receptor superfamily member 10B OS=Homo sapiens GN=TNFRSF10B PE=1 SV=2	HUMAN	3
112	5.16	5.16	32.37000108	19.93999928	8.959999681	sp|P98172|EFNB1_HUMAN	Ephrin-B1 OS=Homo sapiens GN=EFNB1 PE=1 SV=1	HUMAN	2
113	5.13	5.13	19.47000027	7.372999936	5.183999985	sp|Q8WUM4|PDC6I_HUMAN	Programmed cell death 6-interacting protein OS=Homo sapiens GN=PDCD6IP PE=1 SV=1	HUMAN	4
114	5.07	5.07	22.72000015	13.17999959	10.54999977	sp|Q16658|FSCN1_HUMAN	Fascin OS=Homo sapiens GN=FSCN1 PE=1 SV=3	HUMAN	3
116	4.93	4.93	13.23000044	5.104000121	5.104000121	sp|P22314|UBA1_HUMAN	Ubiquitin-like modifier-activating enzyme 1 OS=Homo sapiens GN=UBA1 PE=1 SV=3	HUMAN	3
118	4.82	4.82	11.76000014	11.76000014	8.823999763	sp|P50452|SPB8_HUMAN	Serpin B8 OS=Homo sapiens GN=SERPINB8 PE=1 SV=2	HUMAN	3
122	4.56	14.8	43.95000041	22.86999971	19.50999945	sp|Q9BUF5|TBB6_HUMAN	Tubulin beta-6 chain OS=Homo sapiens GN=TUBB6 PE=1 SV=1	HUMAN	9
123	4.48	4.48	44.2900002	20.46999931	9.843000025	sp|P07237|PDIA1_HUMAN	Protein disulfide-isomerase OS=Homo sapiens GN=P4HB PE=1 SV=3	HUMAN	2
129	4.28	4.28	11.12999991	4.662000015	1.902999915	sp|P26006|ITA3_HUMAN	Integrin alpha-3 OS=Homo sapiens GN=ITGA3 PE=1 SV=5	HUMAN	2
130	4.22	4.22	39.16000128	15.02999961	11.54000014	sp|P52907|CAZA1_HUMAN	F-actin-capping protein subunit alpha-1 OS=Homo sapiens GN=CAPZA1 PE=1 SV=3	HUMAN	2
132	4.11	4.11	21.49000019	6.837999821	5.739000067	sp|Q13443|ADAM9_HUMAN	Disintegrin and metalloproteinase domain-containing protein 9 OS=Homo sapiens GN=ADAM9 PE=1 SV=1	HUMAN	2
134	4.06	4.06	10.04000008	6.319999695	4.833000153	sp|Q92692|PVRL2_HUMAN	Nectin-2 OS=Homo sapiens GN=PVRL2 PE=1 SV=1	HUMAN	3
137	4.02	4.02	22.08999991	9.593000263	9.593000263	sp|Q9UJ70|NAGK_HUMAN	N-acetyl-D-glucosamine kinase OS=Homo sapiens GN=NAGK PE=1 SV=4	HUMAN	2
138	4	4	20.61000019	15.35000056	15.35000056	sp|P21926|CD9_HUMAN	CD9 antigen OS=Homo sapiens GN=CD9 PE=1 SV=4	HUMAN	2
139	3.97	6.36	10.49000025	1.768000051	1.768000051	sp|O75369|FLNB_HUMAN	Filamin-B OS=Homo sapiens GN=FLNB PE=1 SV=2	HUMAN	4
140	3.97	3.97	9.466999769	6.706000119	6.706000119	sp|Q01650|LAT1_HUMAN	Large neutral amino acids transporter small subunit 1 OS=Homo sapiens GN=SLC7A5 PE=1 SV=2	HUMAN	2
145	3.82	3.82	20.57999969	6.989999861	5.048999935	sp|P11413|G6PD_HUMAN	Glucose-6-phosphate 1-dehydrogenase OS=Homo sapiens GN=G6PD PE=1 SV=4	HUMAN	2
147	3.75	3.75	7.70900026	2.497999929	0.861299969	sp|Q6UVK1|CSPG4_HUMAN	Chondroitin sulfate proteoglycan 4 OS=Homo sapiens GN=CSPG4 PE=1 SV=2	HUMAN	2
149	3.64	3.64	36.91000044	27.1299988	7.255999744	sp|P05388|RLA0_HUMAN	60S acidic ribosomal protein P0 OS=Homo sapiens GN=RPLP0 PE=1 SV=1	HUMAN	2
152	3.57	3.57	11.38999984	7.879000157	4.484999925	sp|Q00839|HNRPU_HUMAN	Heterogeneous nuclear ribonucleoprotein U OS=Homo sapiens GN=HNRNPU PE=1 SV=6	HUMAN	2
153	3.54	3.54	15.00999928	9.380999953	6.566999853	sp|O43175|SERA_HUMAN	D-3-phosphoglycerate dehydrogenase OS=Homo sapiens GN=PHGDH PE=1 SV=4	HUMAN	3
154	3.47	3.47	51.42999887	20.94999999	20.94999999	sp|P10599|THIO_HUMAN	Thioredoxin OS=Homo sapiens GN=TXN PE=1 SV=3	HUMAN	2
155	3.45	3.45	10.40000021	8.406999707	5.75199984	sp|P49411|EFTU_HUMAN	Elongation factor Tu, mitochondrial OS=Homo sapiens GN=TUFM PE=1 SV=2	HUMAN	2
158	3.4	3.4	11.40000001	4.825000092	4.825000092	sp|P39656|OST48_HUMAN	Dolichyl-diphosphooligosaccharide--protein glycosyltransferase 48 kDa subunit OS=Homo sapiens GN=DDOST PE=1 SV=4	HUMAN	2
159	3.32	3.32	9.788999707	5.053000152	2.105000056	sp|Q76M96|CCD80_HUMAN	Coiled-coil domain-containing protein 80 OS=Homo sapiens GN=CCDC80 PE=1 SV=1	HUMAN	2
160	3.3	3.3	19.84000057	10.18000022	3.39399986	sp|P27487|DPP4_HUMAN	Dipeptidyl peptidase 4 OS=Homo sapiens GN=DPP4 PE=1 SV=2	HUMAN	2
161	3.27	3.27	19.14999932	5.257000029	5.257000029	sp|P18084|ITB5_HUMAN	Integrin beta-5 OS=Homo sapiens GN=ITGB5 PE=1 SV=1	HUMAN	3
163	3.23	3.23	22.69999981	9.573999792	9.573999792	sp|Q16270|IBP7_HUMAN	Insulin-like growth factor-binding protein 7 OS=Homo sapiens GN=IGFBP7 PE=1 SV=1	HUMAN	2
165	3.21	3.21	21.66000009	8.098000288	8.098000288	sp|P26599|PTBP1_HUMAN	Polypyrimidine tract-binding protein 1 OS=Homo sapiens GN=PTBP1 PE=1 SV=1	HUMAN	2
167	3.17	3.17	8.128999919	2.284999937	1.011999976	sp|Q99715|COCA1_HUMAN	Collagen alpha-1(XII) chain OS=Homo sapiens GN=COL12A1 PE=1 SV=2	HUMAN	2
170	3.04	4.77	36.70000136	12.5	8.511000127	sp|P35237|SPB6_HUMAN	Serpin B6 OS=Homo sapiens GN=SERPINB6 PE=1 SV=3	HUMAN	3
172	2.93	2.93	35.64999998	16.20000005	9.72200036	sp|P23284|PPIB_HUMAN	Peptidyl-prolyl cis-trans isomerase B OS=Homo sapiens GN=PPIB PE=1 SV=2	HUMAN	2
174	2.72	2.72	16.49000049	5.378999934	4.67399992	sp|P18206|VINC_HUMAN	Vinculin OS=Homo sapiens GN=VCL PE=1 SV=4	HUMAN	3
176	2.62	2.62	5.155999959	2.256000042	2.256000042	sp|O60462|NRP2_HUMAN	Neuropilin-2 OS=Homo sapiens GN=NRP2 PE=1 SV=2	HUMAN	2
177	2.59	17.3	29.60999906	18.26000065	15.60000032	sp|P04259|K2C6B_HUMAN	Keratin, type II cytoskeletal 6B OS=Homo sapiens GN=KRT6B PE=1 SV=5	HUMAN	10
178	2.59	2.59	5.623999983	4.664000124	1.645999961	sp|Q92841|DDX17_HUMAN	Probable ATP-dependent RNA helicase DDX17 OS=Homo sapiens GN=DDX17 PE=1 SV=2	HUMAN	1
181	2.47	2.47	8.536999673	2.149000019	0.716400007	sp|Q00610|CLH1_HUMAN	Clathrin heavy chain 1 OS=Homo sapiens GN=CLTC PE=1 SV=5	HUMAN	1
183	2.41	2.41	19.9300006	4.650999978	1.992999949	sp|Q07065|CKAP4_HUMAN	Cytoskeleton-associated protein 4 OS=Homo sapiens GN=CKAP4 PE=1 SV=2	HUMAN	1
184	2.39	2.39	23.80000055	12.35999987	5.720999837	sp|P26641|EF1G_HUMAN	Elongation factor 1-gamma OS=Homo sapiens GN=EEF1G PE=1 SV=3	HUMAN	2
186	2.3	2.3	53.96999717	15.87000042	12.16999963	sp|Q99497|PARK7_HUMAN	Protein DJ-1 OS=Homo sapiens GN=PARK7 PE=1 SV=2	HUMAN	1
188	2.19	2.19	17.85999984	5.857000127	2.195999958	sp|Q15582|BGH3_HUMAN	Transforming growth factor-beta-induced protein ig-h3 OS=Homo sapiens GN=TGFBI PE=1 SV=1	HUMAN	1
191	2.17	2.17	9.898000211	3.172999993	1.649999991	sp|P05106|ITB3_HUMAN	Integrin beta-3 OS=Homo sapiens GN=ITGB3 PE=1 SV=2	HUMAN	1
192	2.15	2.15	19.40000057	7.357999682	4.013000056	sp|Q99623|PHB2_HUMAN	Prohibitin-2 OS=Homo sapiens GN=PHB2 PE=1 SV=2	HUMAN	1
193	2.14	2.14	57.13999867	19.69999969	15.2700007	sp|P07203|GPX1_HUMAN	Glutathione peroxidase 1 OS=Homo sapiens GN=GPX1 PE=1 SV=4	HUMAN	1
194	2.14	2.14	29.26999927	13.16999942	4.87800017	sp|P04792|HSPB1_HUMAN	Heat shock protein beta-1 OS=Homo sapiens GN=HSPB1 PE=1 SV=2	HUMAN	1
196	2.12	2.12	17.10000038	9.664999694	5.57599999	sp|O95297|MPZL1_HUMAN	Myelin protein zero-like protein 1 OS=Homo sapiens GN=MPZL1 PE=1 SV=1	HUMAN	1
198	2.1	2.1	16.24000072	4.157999903	2.376000024	sp|P50995|ANX11_HUMAN	Annexin A11 OS=Homo sapiens GN=ANXA11 PE=1 SV=1	HUMAN	1
199	2.09	2.09	17.48999953	3.959999979	3.299999982	sp|Q9UBR2|CATZ_HUMAN	Cathepsin Z OS=Homo sapiens GN=CTSZ PE=1 SV=1	HUMAN	1
201	2.07	2.07	8.690000325	1.750000007	1.085999981	sp|P46940|IQGA1_HUMAN	Ras GTPase-activating-like protein IQGAP1 OS=Homo sapiens GN=IQGAP1 PE=1 SV=1	HUMAN	1
202	2.05	2.05	9.222000092	3.234000131	2.036000043	sp|P48960|CD97_HUMAN	CD97 antigen OS=Homo sapiens GN=CD97 PE=1 SV=4	HUMAN	1
204	2.03	2.03	11.46000028	2.500000037	2.500000037	sp|P31930|QCR1_HUMAN	Cytochrome b-c1 complex subunit 1, mitochondrial OS=Homo sapiens GN=UQCRC1 PE=1 SV=3	HUMAN	1
205	2.02	2.02	3.607000038	1.090999972	1.090999972	sp|Q9NQC3|RTN4_HUMAN	Reticulon-4 OS=Homo sapiens GN=RTN4 PE=1 SV=2	HUMAN	1
211	2	29.37	59.20000076	53.43999863	46.77999914	sp|Q71U36|TBA1A_HUMAN	Tubulin alpha-1A chain OS=Homo sapiens GN=TUBA1A PE=1 SV=1	HUMAN	15
212	2	15.89	45.86000144	27.90000141	27.90000141	sp|Q29940|1B59_HUMAN	HLA class I histocompatibility antigen, B-59 alpha chain OS=Homo sapiens GN=HLA-B PE=1 SV=1	HUMAN	8
213	2	2.04	13.87999952	8.540999889	8.540999889	sp|P29692|EF1D_HUMAN	Elongation factor 1-delta OS=Homo sapiens GN=EEF1D PE=1 SV=5	HUMAN	1
215	2	2	8.873999864	1.535999961	1.535999961	sp|Q9UHD8|SEPT9_HUMAN	Septin-9 OS=Homo sapiens GN=SEPT9 PE=1 SV=2	HUMAN	1
216	2	2	12.31999993	3.872999921	3.872999921	sp|Q9UBV8|PEF1_HUMAN	Peflin OS=Homo sapiens GN=PEF1 PE=1 SV=1	HUMAN	1
220	2	2	33.9899987	7.190000266	7.190000266	sp|Q5JXB2|UE2NL_HUMAN	Putative ubiquitin-conjugating enzyme E2 N-like OS=Homo sapiens GN=UBE2NL PE=1 SV=1	HUMAN	1
222	2	2	11.0799998	3.125	3.125	sp|Q9NYL9|TMOD3_HUMAN	Tropomodulin-3 OS=Homo sapiens GN=TMOD3 PE=1 SV=1	HUMAN	1
224	2	2	10.27999967	5.513999984	5.513999984	sp|O43813|LANC1_HUMAN	LanC-like protein 1 OS=Homo sapiens GN=LANCL1 PE=1 SV=1	HUMAN	1
225	2	2	4.101999849	1.823000051	1.823000051	sp|O00410|IPO5_HUMAN	Importin-5 OS=Homo sapiens GN=IPO5 PE=1 SV=4	HUMAN	1
227	2	2	4.630000144	2.315000072	2.315000072	sp|Q8NBS9|TXND5_HUMAN	Thioredoxin domain-containing protein 5 OS=Homo sapiens GN=TXNDC5 PE=1 SV=2	HUMAN	1
230	2	2	13.89999986	4.247000068	4.247000068	sp|Q16563|SYPL1_HUMAN	Synaptophysin-like protein 1 OS=Homo sapiens GN=SYPL1 PE=1 SV=1	HUMAN	1
231	2	2	3.553000093	3.553000093	3.553000093	sp|Q92597|NDRG1_HUMAN	Protein NDRG1 OS=Homo sapiens GN=NDRG1 PE=1 SV=1	HUMAN	1
236	2	2	4.518000036	4.518000036	4.518000036	sp|P29966|MARCS_HUMAN	Myristoylated alanine-rich C-kinase substrate OS=Homo sapiens GN=MARCKS PE=1 SV=4	HUMAN	1
237	2	2	8.552999794	8.552999794	8.552999794	sp|O14880|MGST3_HUMAN	Microsomal glutathione S-transferase 3 OS=Homo sapiens GN=MGST3 PE=1 SV=1	HUMAN	1
238	1.89	1.89	3.088000044	1.683999971	1.683999971	sp|Q86YZ3|HORN_HUMAN	Hornerin OS=Homo sapiens GN=HRNR PE=1 SV=2	HUMAN	1
240	1.82	1.82	7.464999706	2.25699991	2.25699991	sp|P27816|MAP4_HUMAN	Microtubule-associated protein 4 OS=Homo sapiens GN=MAP4 PE=1 SV=3	HUMAN	2
242	1.7	1.7	2.793999948	2.793999948	2.793999948	sp|Q96AC1|FERM2_HUMAN	Fermitin family homolog 2 OS=Homo sapiens GN=FERMT2 PE=1 SV=1	HUMAN	1
246	1.48	1.48	25.33000112	5.333000049	5.333000049	sp|P21266|GSTM3_HUMAN	Glutathione S-transferase Mu 3 OS=Homo sapiens GN=GSTM3 PE=1 SV=3	HUMAN	1
247	1.4	1.4	2.975000069	1.487000007	0.811399985	sp|Q92626|PXDN_HUMAN	Peroxidasin homolog OS=Homo sapiens GN=PXDN PE=1 SV=2	HUMAN	1
248	1.39	1.39	5.093999952	1.475000009	1.475000009	sp|Q96TA1|NIBL1_HUMAN	Niban-like protein 1 OS=Homo sapiens GN=FAM129B PE=1 SV=3	HUMAN	1
249	1.37	1.37	16.80999994	10.62000021	7.374999672	sp|P07858|CATB_HUMAN	Cathepsin B OS=Homo sapiens GN=CTSB PE=1 SV=3	HUMAN	2
250	1.34	1.34	39.82999921	3.734000027	3.734000027	sp|O00299|CLIC1_HUMAN	Chloride intracellular channel protein 1 OS=Homo sapiens GN=CLIC1 PE=1 SV=4	HUMAN	1
