# Supplementary material for: Plasmatic Membrane Expression of Adhesion Molecules in Human Cardiac Progenitor/Stem Cells Might Explain Their Superior Cell Engraftment after Cell Transplantation
Source: Stem Cells Int. 2020 Oct 10;2020:8872009. doi: 10.1155/2020/8872009 (PMC7569451; doi:10.1155/2020/8872009)
Supplement: Supplementary 6 — Supplemental Table 5. GO biological processes were identified from the interactome analysis of cardiac progenitor/stem cells. [file 8872009.f6.txt]

ID	N	lor	pval?	name	
GO:0018107	16	-719	4	peptidyl-threonine phosphorylation	
GO:0035303	22	-602	4	regulation of dephosphorylation	
GO:0007623	38	479	4	circadian rhythm	
GO:0051341	19	661	4	regulation of oxidoreductase activity	
GO:0043149	15	-701	5	stress fiber assembly	
GO:2000736	19	-633	6	regulation of stem cell differentiation	
GO:0010921	14	-691	8	regulation of phosphatase activity	
GO:0001837	21	-577	8	epithelial to mesenchymal transition	
GO:0030397	18	-601	9	membrane disassembly	
GO:0031532	19	603	9	actin cytoskeleton reorganization	
GO:0051492	11	-743	0.01	regulation of stress fiber assembly	
GO:0061640	14	0.68	0.01	cytoskeleton-dependent cytokinesis	
GO:0048762	29	-472	11	mesenchymal cell differentiation	
GO:0008631	20	556	13	intrinsic apoptotic signaling pathway in response to oxidative stress	
GO:0016925	28	-461	17	protein sumoylation	
GO:0036473	26	465	0.02	cell death in response to oxidative stress	
GO:0002223	39	-373	21	stimulatory C-type lectin receptor signaling pathway	
GO:0002220	39	-373	21	innate immune response activating cell surface receptor signaling pathway	
GO:1903036	12	625	22	positive regulation of response to wounding	
GO:0035601	21	514	24	protein deacylation	
GO:0006476	20	512	29	protein deacetylation	
GO:0042787	24	0.45	0.03	protein ubiquitination involved in ubiquitin-dependent protein catabolic process	
GO:1902042	10	707	32	negative regulation of extrinsic apoptotic signaling pathway via death domain receptors	
GO:1901615	49	309	35	organic hydroxy compound metabolic process	
GO:0008213	23	-445	36	protein alkylation	
GO:0048863	50	-301	37	stem cell differentiation	
GO:0010876	28	399	37	lipid localization	
GO:0050880	15	514	39	regulation of blood vessel size	
GO:0010828	10	-616	45	positive regulation of glucose transport	
GO:1901879	23	423	47	regulation of protein depolymerization	
